# Supplementary material for: Transcriptomic analysis reveals a previously unknown role for CD8+ T-cells in rVSV-EBOV mediated protection
Source: PubMed Central journal article supplement (PMC5430516; doi:10.1038/s41598-017-01032-8), 2017-04-20
Supplement: 41598_2017_1032_MOESM1_ESM.pdf [file 41598_2017_1032_MOESM1_ESM.pdf]

1 **Transcriptomic analysis reveals a previously unknown role for CD8<sup>+</sup> T-**  
2 **cells in rVSV-EBOV mediated protection**

3 Andrea Rivera<sup>1</sup>, Suhas Sureshchandra<sup>2</sup>, Andrea Marzi<sup>3</sup>, Heinz Feldmann<sup>3</sup>, Ilhem  
4 Messaoudi<sup>4\*</sup>

5

6 **Supplementary Information**

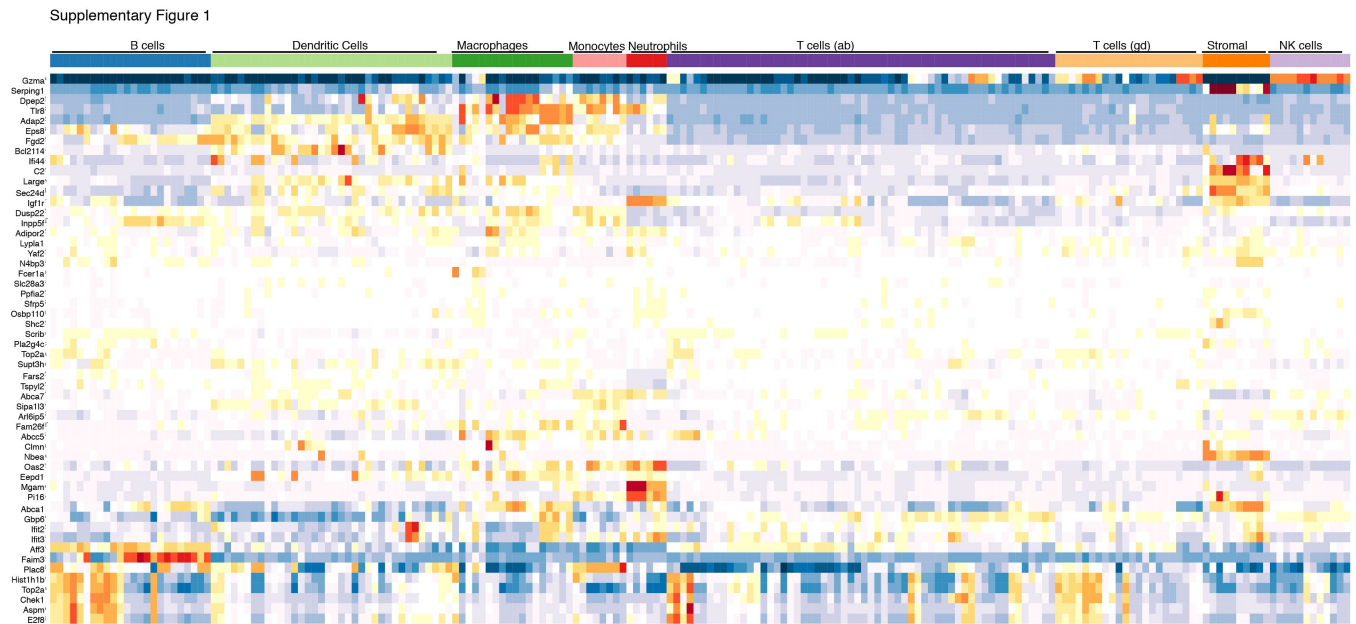

8 **Supplementary Figure 1. ImmGen analysis of DEGs 7 days post vaccination.**

9 Heatmap profile showing expression profile of genes differentially expressed after rVSV-  
10 EBOV vaccination across immune cell populations as predicted by ImmGen's  
11 MyGeneSet application. Each row designates a gene and corresponding microarray ID  
12 while each column represents a study. Red indicates high likelihood of expression while  
13 blue indicates low likelihood of expression within a given immune cell subset.

Supplementary Figure 2

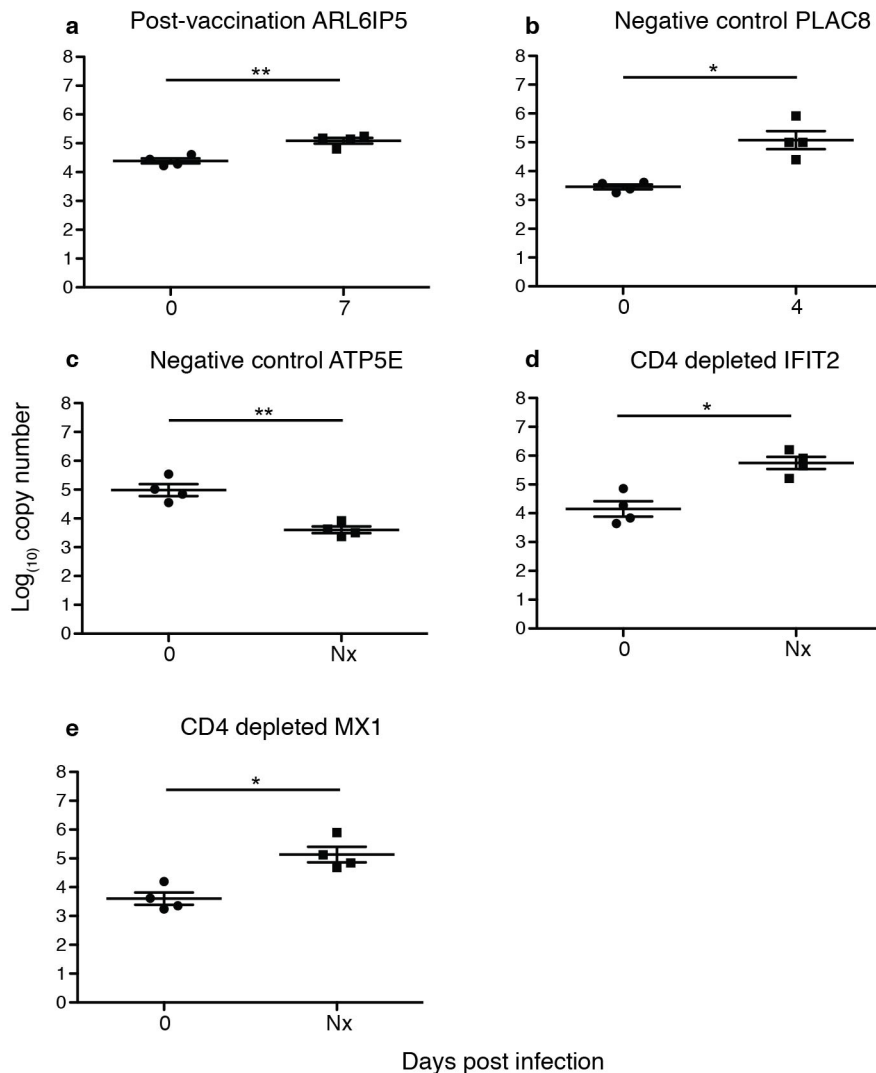

1

2 **Supplementary Figure 2. qRT-PCR validation of DEGs post-challenge.** qRT-PCR

3 expression levels of (a) ARL6IP5 in animals 7 days post vaccination with rVSV-EBOV-

4 GP; t-value=8.284; degrees of freedom (df) = 3. (b) PLAC8 in negative controls 4 dpi; t-

5 value=4.550; df=3. (c) ATP5E in negative controls at necropsy; t-value=6.299; df=3. (d)

6 IFIT2 in CD4-depleted animals at necropsy; t-value=3.341; df=3. (e) MX1 in CD4-

7 depleted animals at necropsy are shown; t-value=3.641; df=3. Expression of mRNA was

8 normalized to expression of RPL32. Changes in gene expression post infection were

1 determined using a paired two-sided t-test (n=4 in each group). Means  $\pm$  are shown. \*, P

2 < 0.05, \*\*, P < 0.01, \*\*\*, P < 0.001, \*\*\*\*, P < 0.0001).

3

Supplementary Figure 3

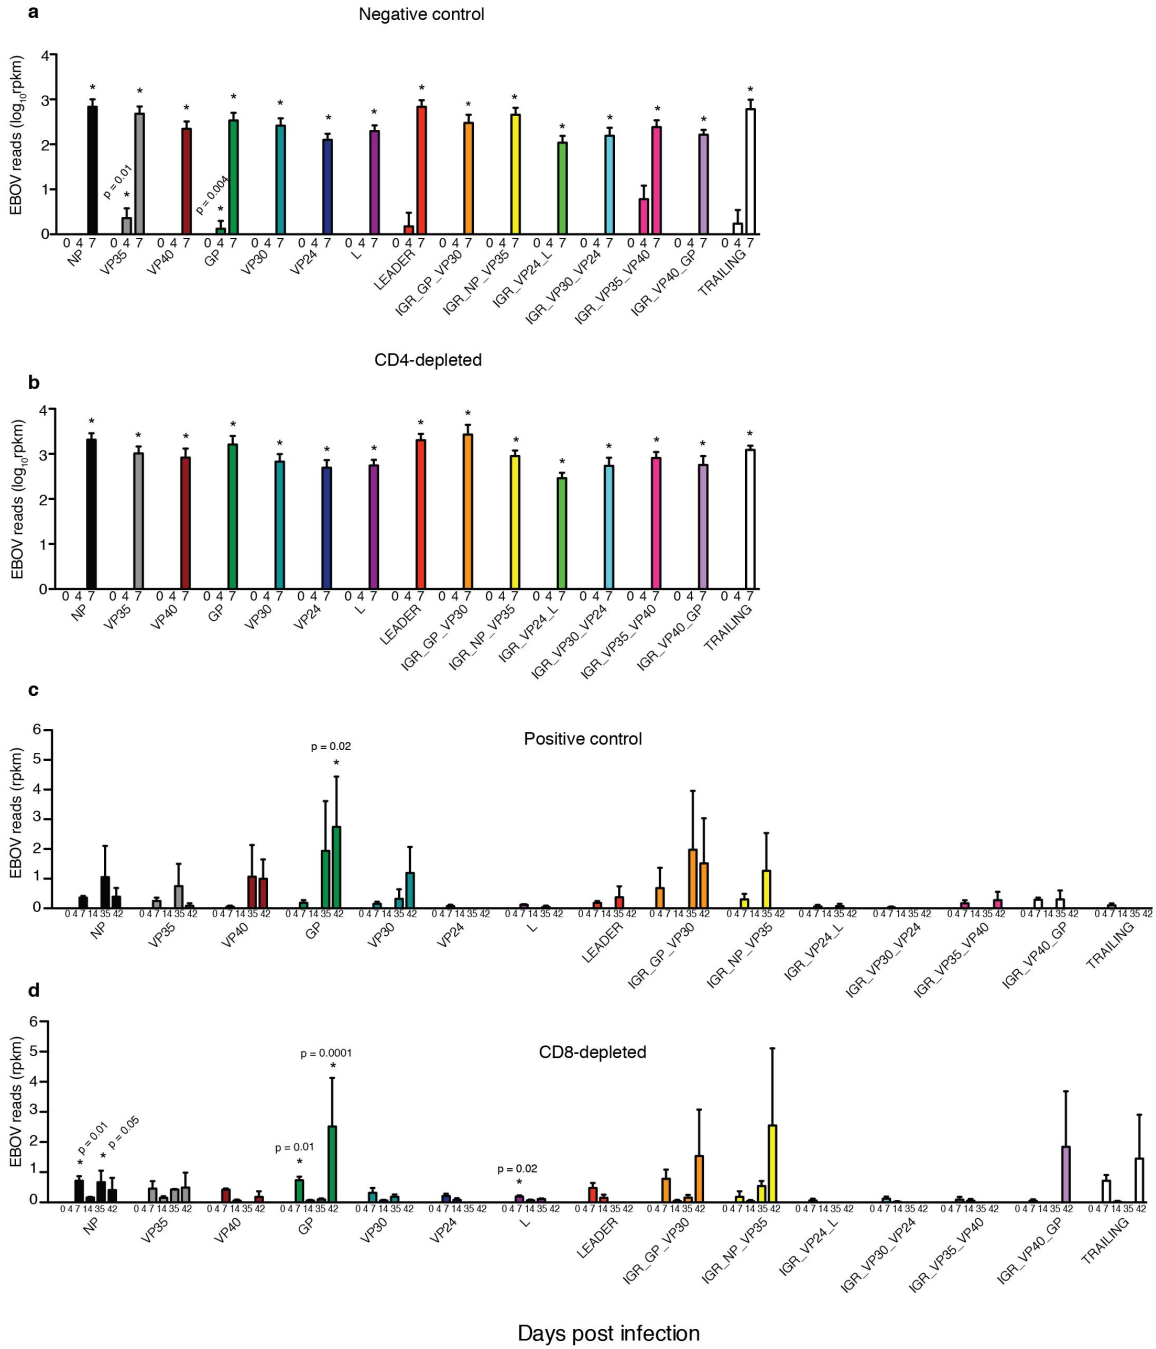

1

2

3 **Supplementary Figure 3. EBOV reads mapping to open reading frames and**

4 **intergenic regions. RPKM normalized RNA-Seq reads mapping to each EBOV open**

1 reading frame (ORF), intergenic region (IGR), as well as leader and trailing sequences at  
2 each time point in (a) negative controls, (b) CD4-depleted animals, (c) Positive controls  
3 and (d) CD8 depleted animals; n=4 in all groups. FDR adjusted p-Value was obtained  
4 following *EdgeR* analysis. In both negative control and CD4-depleted animals, (\*)  
5 denotes a p-Value < 0.0001.

6

Supplementary Figure 4

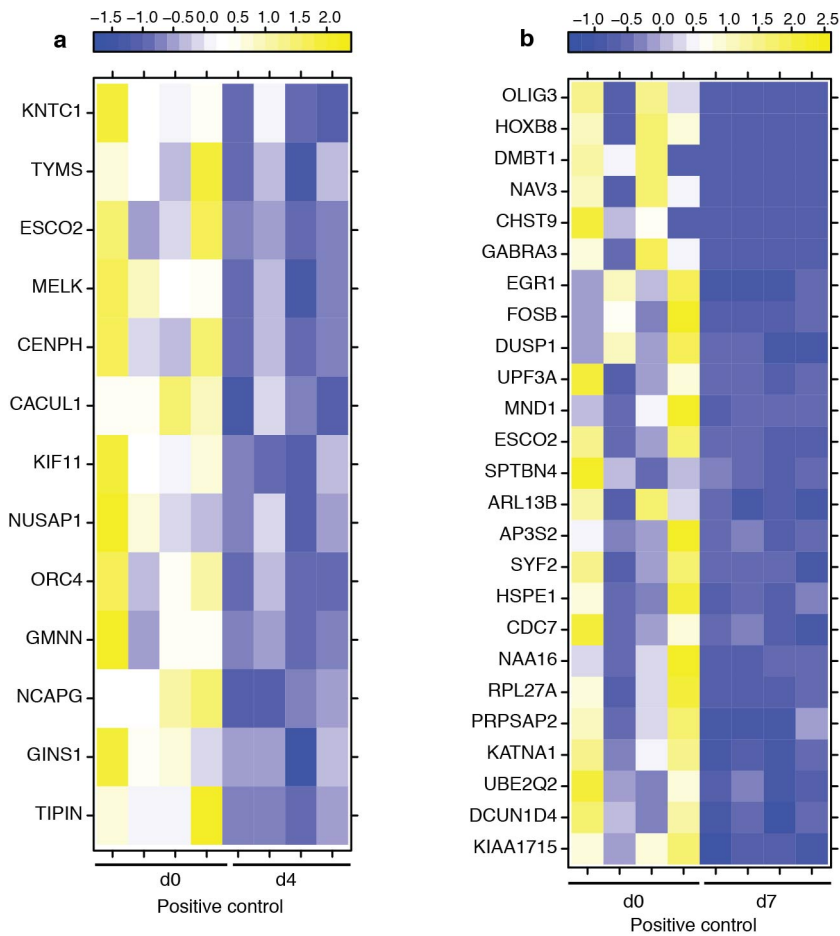

1

2

3 **Supplementary Figure 4. Downregulated genes in positive control animals. (a)**

4 Heatmap of genes downregulated 4 dpi in positive control animals that map to “Mitotic

5 Cell Cycle Process”; each column represents 1 animal in the positive control group. **(b)**

6 Heatmap of all 25 genes downregulated 7 dpi in vaccinated animals.

Supplementary Figure 5

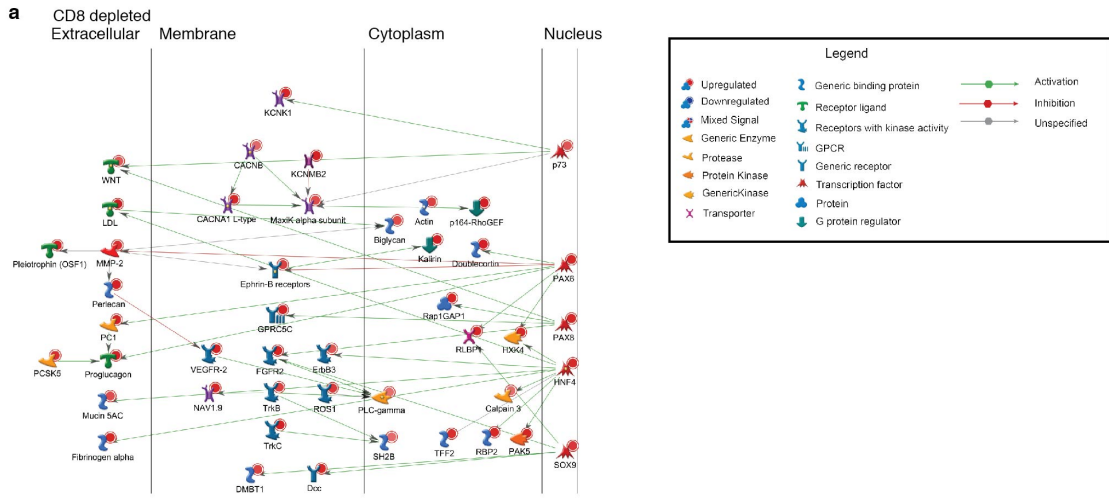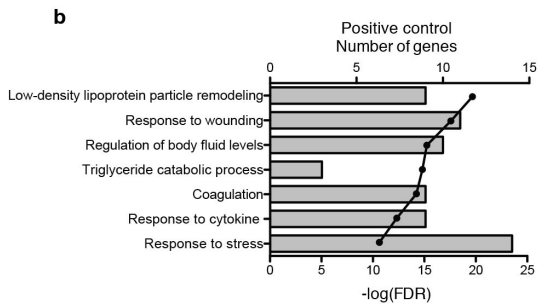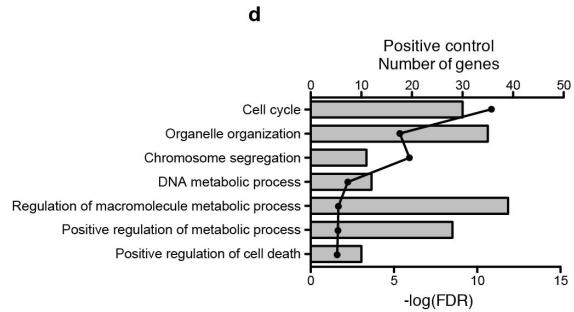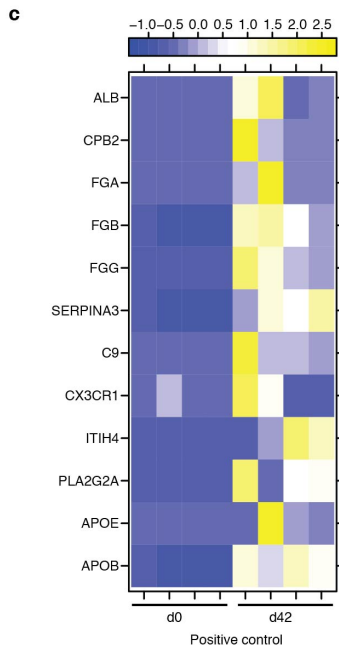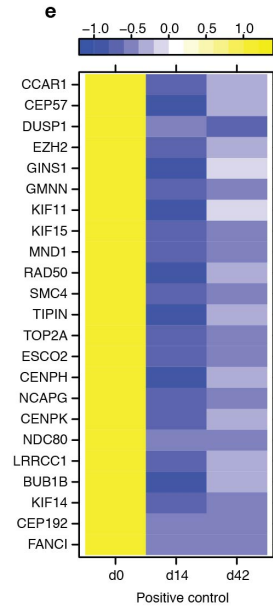

1 **Supplementary Figure 5. DEGs upregulated 35 dpi in CD8-depleted animals and 42**  
2 **dpi in positive control animals.** (a) Network depicting direct interactions of genes  
3 upregulated 35 dpi in CD8-depleted animals that map to “Signaling”. (b) Bar graph  
4 depicting the most statistically significant GO terms enriched among up-regulated genes  
5 positive control animals 42 dpi (c) Heatmap of genes upregulated 42 dpi in positive  
6 control animals mapping to “Response to Cytokine” and “Coagulation”; each column  
7 represents 1 animal in the positive control group. (d) Bar graph depicting the most  
8 statistically significant GO terms enriched among down-regulated genes positive control  
9 animals 42 dpi. (e) Heatmap of down-regulated genes 42 dpi in positive control animals  
10 mapping to “Cell Cycle”; each column shows median transcript RPKM counts of all  
11 animals in the positive control group at each day.  
12



1 **Supplementary Table 1. Composition of DEGs**  
 2

| <b>Up-regulated 4 dpi</b>    |                         |                     |                         |                     |
|------------------------------|-------------------------|---------------------|-------------------------|---------------------|
| <b>Category</b>              | <b>Negative control</b> | <b>CD4-depleted</b> | <b>Positive control</b> | <b>CD8-depleted</b> |
| Human homolog                | 552                     | 115                 | 1                       | 8                   |
| ncRNA                        | 97                      | 2                   | 0                       | 0                   |
| uncharacterized              | 74                      | 9                   | 1                       | 9                   |
| <b>Down-regulated 4 dpi</b>  |                         |                     |                         |                     |
| <b>Category</b>              | <b>Negative control</b> | <b>CD4-depleted</b> | <b>Positive control</b> | <b>CD8-depleted</b> |
| Human homolog                | 950                     | 307                 | 37                      | 2                   |
| ncRNA                        | 13                      | 5                   | 63                      | 1                   |
| uncharacterized              | 224                     | 68                  | 12                      | 1                   |
| <b>Up-regulated 7 dpi</b>    |                         |                     |                         |                     |
| <b>Category</b>              | <b>Negative control</b> | <b>CD4-depleted</b> | <b>Positive control</b> | <b>CD8-depleted</b> |
| Human homolog                | 1013                    | 2074                | 49                      | 174                 |
| ncRNA                        | 36                      | 26                  | 3                       | 32                  |
| uncharacterized              | 444                     | 361                 | 11                      | 137                 |
| <b>Down-regulated 7 dpi</b>  |                         |                     |                         |                     |
| <b>Category</b>              | <b>Negative control</b> | <b>CD4-depleted</b> | <b>Positive control</b> | <b>CD8-depleted</b> |
| Human homolog                | 814                     | 1174                | 25                      | 83                  |
| ncRNA                        | 29                      | 79                  | 76                      | 6                   |
| uncharacterized              | 246                     | 365                 | 31                      | 52                  |
| <b>Up-regulated 14 dpi</b>   |                         |                     |                         |                     |
| <b>Category</b>              | <b>Positive control</b> |                     | <b>CD8-depleted</b>     |                     |
| Human homolog                | 32                      |                     | 54                      |                     |
| ncRNA                        | 3                       |                     | 15                      |                     |
| uncharacterized              | 4                       |                     | 8                       |                     |
| <b>Down-regulated 14 dpi</b> |                         |                     |                         |                     |
| <b>Category</b>              | <b>Positive control</b> |                     | <b>CD8-depleted</b>     |                     |
| Human homolog                | 295                     |                     | 179                     |                     |
| ncRNA                        | 72                      |                     | 14                      |                     |
| uncharacterized              | 123                     |                     | 83                      |                     |
| <b>Up-regulated 35 dpi</b>   |                         |                     |                         |                     |
| <b>Category</b>              | <b>Positive control</b> |                     | <b>CD8-depleted</b>     |                     |
| Human homolog                | 1                       |                     | 502                     |                     |
| ncRNA                        | 0                       |                     | 31                      |                     |
| uncharacterized              | 0                       |                     | 305                     |                     |
| <b>Down-regulated 35 dpi</b> |                         |                     |                         |                     |
| <b>Category</b>              | <b>Positive control</b> |                     | <b>CD8-depleted</b>     |                     |
| Human homolog                | 0                       |                     | 536                     |                     |
| ncRNA                        | 0                       |                     | 7                       |                     |

|                              |                         |                     |
|------------------------------|-------------------------|---------------------|
| uncharacterized              | 2                       | 101                 |
| <b>Up-regulated 42 dpi</b>   |                         |                     |
| <b>Category</b>              | <b>Positive control</b> | <b>CD8-depleted</b> |
| Human homolog                | 18                      | 117                 |
| ncRNA                        | 2                       | 7                   |
| uncharacterized              | 5                       | 27                  |
| <b>Down-regulated 42 dpi</b> |                         |                     |
| <b>Category</b>              | <b>Positive control</b> | <b>CD8-depleted</b> |
| Human homolog                | 84                      | 352                 |
| ncRNA                        | 15                      | 87                  |
| uncharacterized              | 170                     | 136                 |

1  
2  
3  
4

**Supplementary Table 2.** Gene ontology enrichment of positive control animals 14 dpi

| DPI | Up-regulated                                  | # DEG | FDR adjusted pValue | Down-regulated                           | # DEG | FDR adjusted pValue |
|-----|-----------------------------------------------|-------|---------------------|------------------------------------------|-------|---------------------|
| 14  | Glycogen catabolic process                    | 2     | 6.959E-02           | Cell cycle                               | 77    | 1.445E-21           |
|     | Regulation of metabolic process               | 19    | 6.959E-02           | Organelle organization                   | 103   | 2.529E-14           |
|     | Biological regulation                         | 25    | 2.927E+00           | Chromosome segregation                   | 24    | 1.534E-11           |
|     | Positive regulation of metabolic process      | 12    | 1.010E-01           | Cellular macromolecule metabolic process | 159   | 1.753E-11           |
|     | System development                            | 13    | 1.306E-01           | Metabolic process                        | 197   | 3.395E-07           |
|     | Regulation of macromolecule metabolic process | 15    | 1.306E-01           | Viral transcription                      | 12    | 2.191E-06           |

1 **Supplementary Table 3.** Gene ontology enrichment of CD8-depleted animals 14 and 35  
 2 dpi

| DPI | Up-regulated                                                        | # DEG | FDR adjusted pValue | Down-regulated                           | # DEG | FDR adjusted pValue |
|-----|---------------------------------------------------------------------|-------|---------------------|------------------------------------------|-------|---------------------|
| 14  | Positive regulation of macrophage derived foam cell differentiation | 7     | 5.404E-09           | Cell cycle                               | 37    | 3.341E-06           |
|     | Triglyceride catabolic process                                      | 7     | 1.205E-07           | Organelle organization                   | 59    | 3.341E-06           |
|     | Regulation of body fluid levels                                     | 14    | 1.060E-05           | Chromosome organization                  | 27    | 2.678E-05           |
|     | Coagulation                                                         | 12    | 1.365E-05           | DNA metabolic process                    | 23    | 1.059E-04           |
|     | Lymphocyte activation                                               | 11    | 1.365E-05           | RNA processing                           | 19    | 1.866E-03           |
|     | Response to virus                                                   | 8     | 1.439E-04           | Macromolecule metabolic process          | 92    | 3.134E-03           |
|     | Response to wounding                                                | 13    | 1.447E-04           | Cellular protein localization            | 26    | 3.228E-03           |
|     | Immune system process                                               | 21    | 6.011E-04           | Cellular response to stress              | 33    | 3.260E-03           |
| 35  | System development                                                  | 236   | 4.277E-23           | Organelle organization                   | 213   | 3.511E-37           |
|     | Cell development                                                    | 127   | 5.278E-18           | Cell cycle                               | 132   | 1.852E-34           |
|     | Regulation of localization                                          | 149   | 5.168E-17           | Cellular macromolecule metabolic process | 306   | 2.859E-23           |
|     | Cell differentiation                                                | 183   | 4.963E-14           | Cell division                            | 62    | 2.097E-21           |
|     | Regulation of ion transport                                         | 61    | 1.063E-13           | Chromosome organization                  | 84    | 1.183E-18           |
|     | Single-organism process                                             | 437   | 1.345E-13           | Cellular metabolic process               | 332   | 3.671E-14           |
|     | Circulatory system development                                      | 71    | 9.951E-12           | Protein metabolic process                | 201   | 8.241E-13           |
|     | Signaling                                                           | 231   | 4.958E-10           | Cellular response to stress              | 107   | 5.467E-12           |
|     | Chemotaxis                                                          | 59    | 1.851E-09           | DNA metabolic process                    | 57    | 1.988E-09           |

3  
 4  
 5
